# Supplementary material
Source: publisher figshare collection journal article supplement (https://acs.figshare.com/ndownloader/files/4091218)
Supplement: Supplementary file 1 [file 4091218]

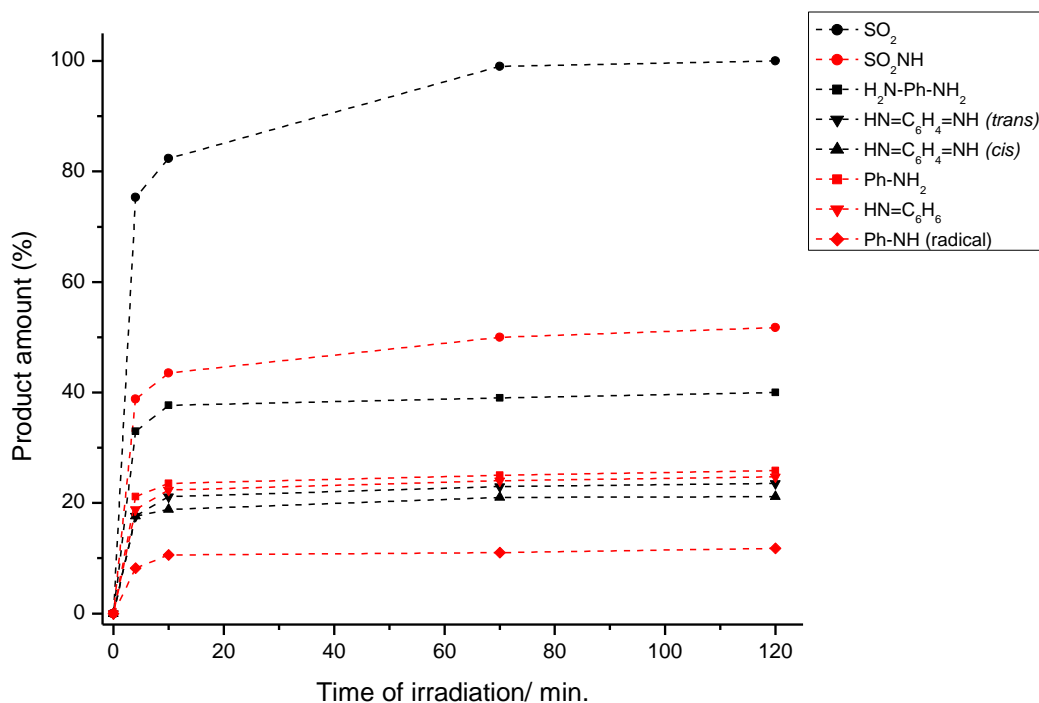

**Figure S5.** Change with time of irradiation ( $\lambda < 215$  nm) of product amounts, estimated from band intensities (peak absorbances, reduced by the corresponding calculated infrared intensities; average values were used for each compound, using as many bands as possible). The normalization was made taking as 100% product amount the quantity of SO<sub>2</sub> in the matrix after 120 min of irradiation. Black symbols refer to products of pathway A in Scheme 3; red symbols to products of pathway B. It was not possible to estimate the product amount for 4-aminoanilino radical, due to extensive band overlapping or low band intensities.
